# Supplementary material for: Stereoselective aggregation of chiral complexes with threefold-symmetric pendant carboxyl groups: an example of “perfect” self-assembly not seen in the crystalline state?
Source: Royal Society of Chemistry journal article supplement (doi:10.1039/c3ra41234b), 2013-01-01
Supplement: c3ra41234b.pdf [file c3ra41234b.pdf]

## Electronic Supporting Information for:

# Stereoselective Aggregation of Chiral Complexes with Threefold-Symmetric Pendant Carboxyl Groups: An Example of “Perfect” Self-Assembly Not Seen in the Crystalline State?

Janina Fischer<sup>†#</sup>, Jeremy D. Hall<sup>#‡</sup>, Philipus J. Patty<sup>#</sup>, Martin A. K. Williams<sup>#</sup>, Mark R. Waterland<sup>#</sup>,  
and Shane G. Telfer<sup>#</sup>

<sup>#</sup> *MacDiarmid Institute for Advanced Materials and Nanotechnology, Institute of Fundamental Sciences, Massey University, Palmerston North.*

<sup>†</sup> *Max-Planck-Institute for Polymer Research, Ackermannweg 10, 55118 Mainz, Germany.*

<sup>‡</sup> *Current address: Research School of Chemistry, Australian National University, Canberra ACT 0200, Australia.*

## 1. Materials and methods

*Complex synthesis:*  $[\text{Rh}(\text{L})_3]$ ,<sup>1</sup>  $[\text{Rh}(\text{L}^b)_3]$ ,<sup>1</sup> and  $[\text{Co}(\text{L})_3]$ <sup>2</sup> were synthesized according to literature procedures.  $[\text{Rh}(\text{L})_3]$  was resolved into its  $\Delta$  and  $\Lambda$  enantiomers following the procedure<sup>2</sup> developed for  $[\text{Co}(\text{L})_3]$ .

*Preparation of the aggregates:* A saturated solution of  $[\text{Rh}(\text{L})_3]$  was prepared in AR grade methanol via a combination of stirring and sonication. All undissolved material was removed by filtration through a 0.45  $\mu\text{m}$  filter. The concentration of this stock solution was established by UV/vis spectroscopy (typically  $3 \times 10^{-4}$  M), and was diluted with further methanol as necessary. Aggregation was induced by deionised water that had been acidified slightly with HCl (typically 2 – 3 drops of 1 M HCl per 100 mL).

*UV/vis Spectroscopy:* UV-visible spectra were collected using an Ocean Optics HR400 detector and SpectraSuite software, with illumination from a DT-Mini-2-GS deuterium-halogen light source or using a Cary 100 Bio spectrophotometer. Solutions were placed in 1 cm plastic or quartz cuvettes for measurement.

*FT-IR Spectroscopy:* All IR spectra were recorded using a Thermo Scientific Nicolet 5700FT-IR spectrophotometer. Unless otherwise stated, FT-IR spectra were measured on solid-state samples using an attenuated total reflection (ATR) module (Ge crystal). Spectra were measured at a resolution of 4  $\text{cm}^{-1}$ .

*Fluorescence spectra:* Emission spectra were recorded on a Horiba FluoroMax-4 spectrofluorimeter running FluorEssence software.

## 2. Supplementary UV/vis spectra

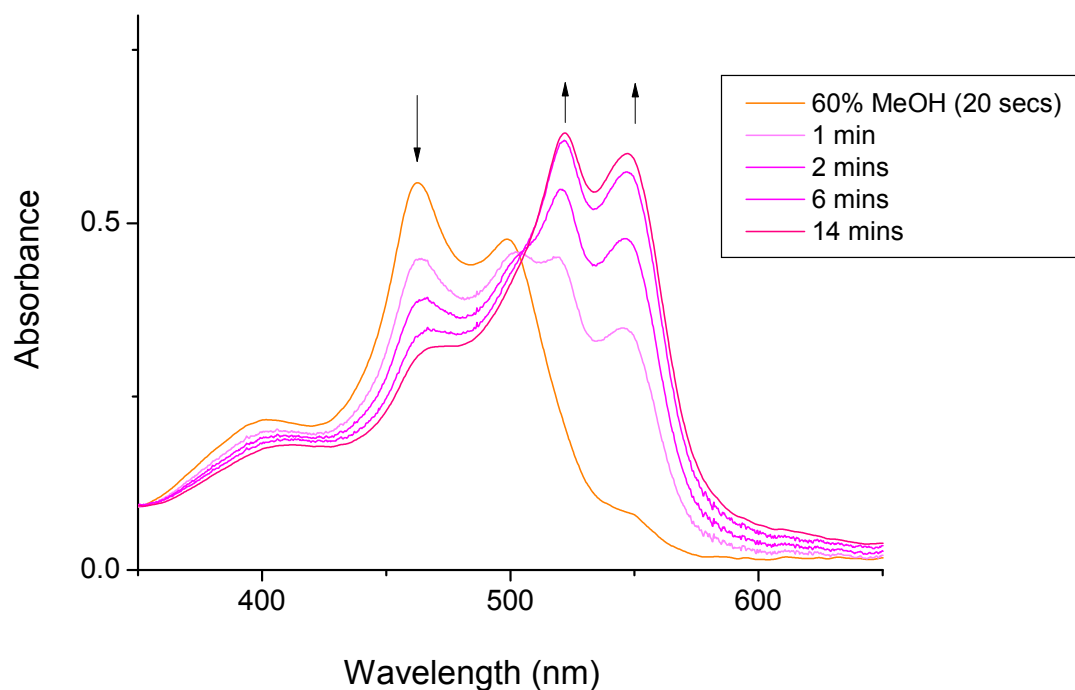

**Figure S1.** (a) Evolution of the UV/vis spectrum of [Rh(L)<sub>3</sub>] after the addition of water to a methanolic solution of the complex to give a MeOH/H<sub>2</sub>O composition of 60/40 v/v. The spectral changes indicate the conversion of form A to form B. Line colours indicate the approximate solution colours.

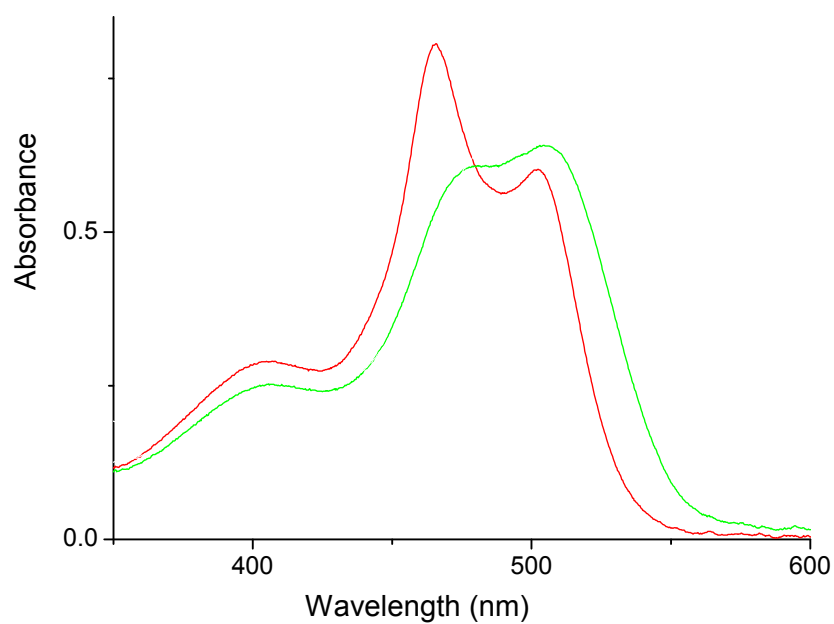

**Figure S2.** UV-visible absorption spectra of [Rh(L)<sub>3</sub>] in DMSO (red curve) and in DMSO/H<sub>2</sub>O 50/50 v/v (green curve).

## 2. Dynamic light scattering

In DLS experiments, a monochromatic polarized beam of laser light is incident on a sample, which is scattered into a detector placed at a certain angle respecting to the incident beam. Our set-up employs a He-Ne laser ( $\lambda = 633$  nm) as a light source. A single mode fibre optics beam splitter divides the scattered light into two beams which impinge on two separate photomultiplier tubes (PMTs) allowing the intensity fluctuations to be analysed using cross-correlation. The PMTs are connected to a multiple tau digital correlator (Flex99, [www.correlator.com](http://www.correlator.com)) in order to calculate the correlation functions.

Samples were placed in a 1 cm path length plastic cuvette (Optics Planet). The concentration of the sample was sufficiently dilute that only single scattering takes place. The cuvette was put into a scattering chamber filled with water as a refractive index matching fluid. Measurements were taken at room temperature and the scattered light was detected at an angle of  $90^\circ$  with respect to the direction of the incident beam.

To determine the size distribution of the particles, we used cumulant<sup>3</sup> and contin analysis.<sup>4</sup>

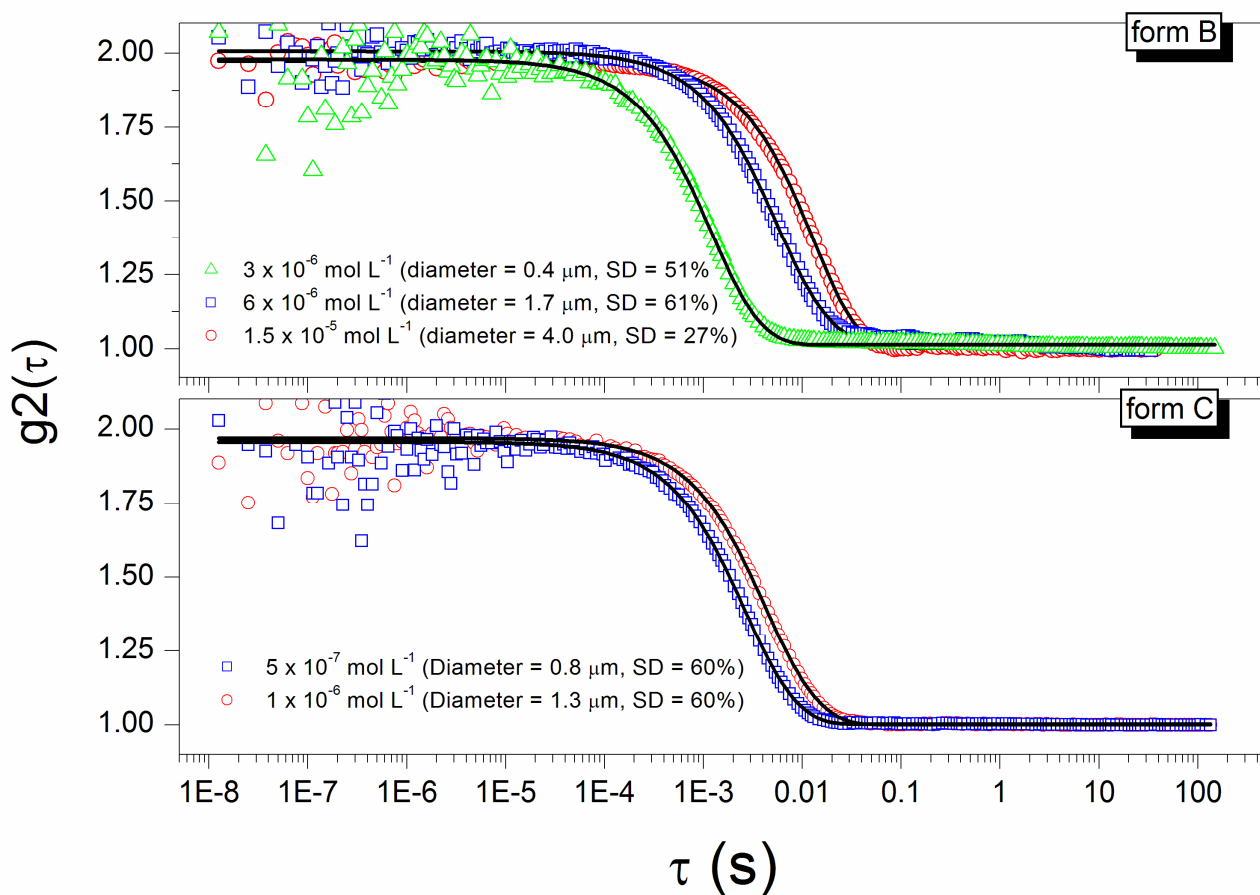

**Figure S3.** Data of intensity-intensity correlation function ( $g^2(\tau)$ ) for forms B and C of  $[\text{Rh}(\text{L})_3]$ . The lines indicate the cumulant fits to the data.

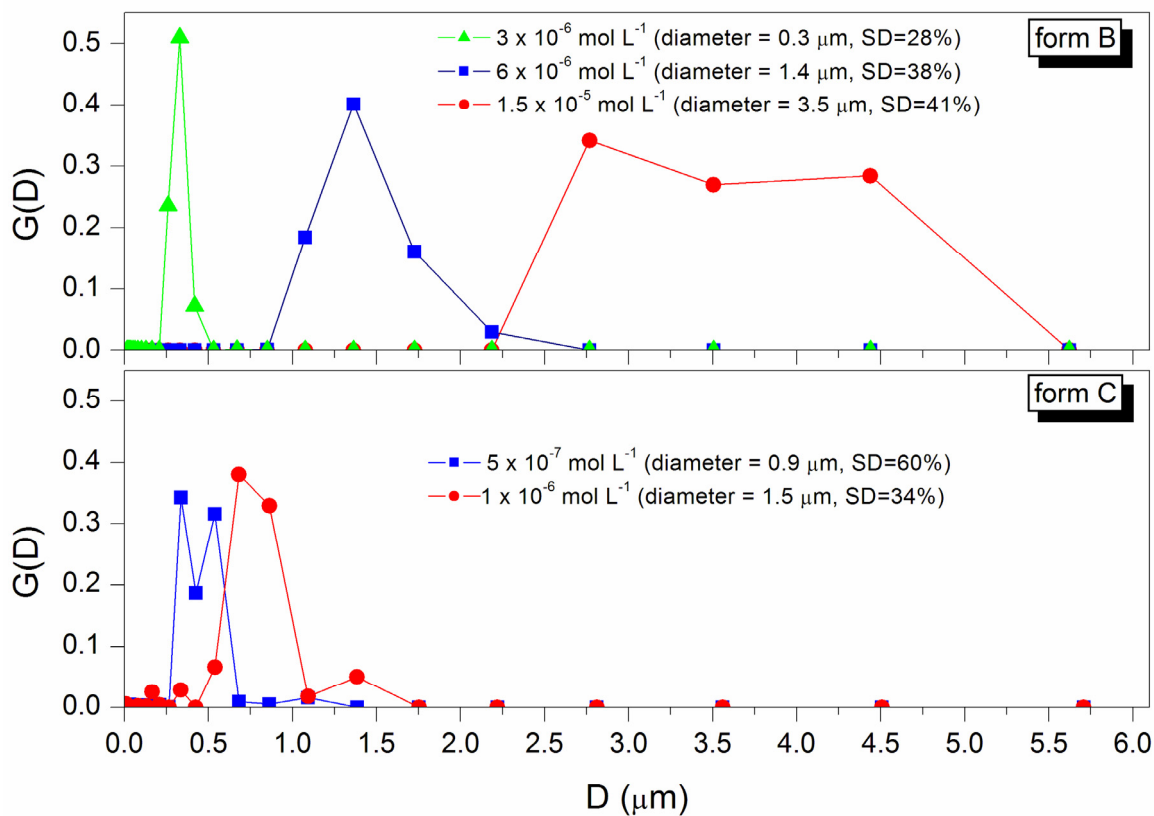

**Figure S4.** Size distribution of form B (upper) and form C (lower) aggregates of  $[\text{Rh}(\text{L})_3]$  extracted from DLS data using contin analysis.

### 3. Transmission electron microscopy (TEM)

Transmission electron micrographs (TEMs) were recorded on a Philips CM10 Transmission Electron Microscope. Samples were adhered to Formvar-coated copper grids

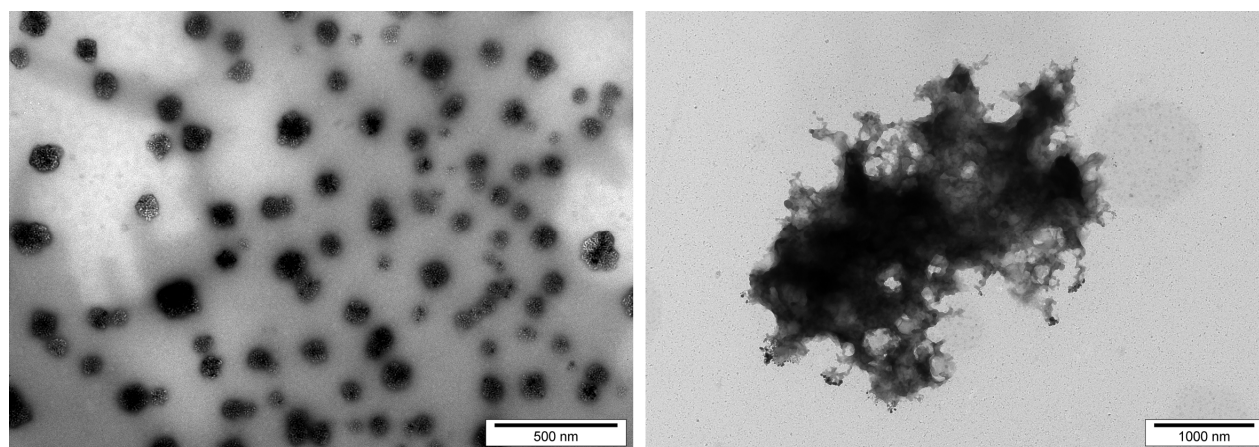

**Figure S5.** Representative TEM images of form C of  $[\text{Rh}(\text{L})_3]$ .

#### 4. Supplementary structural models

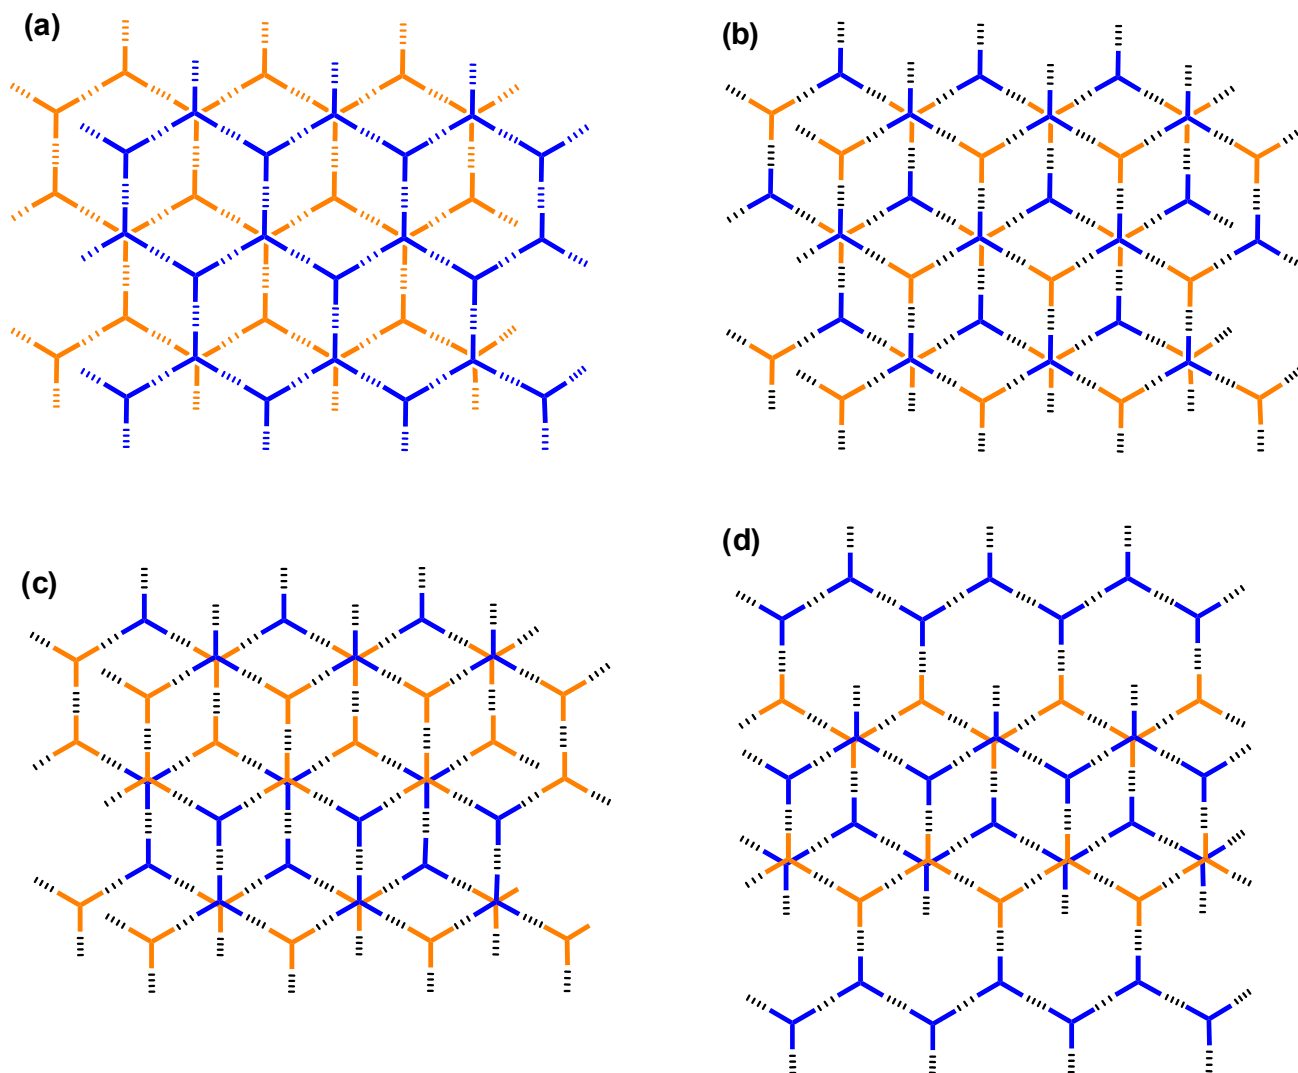

**Figure S6.** Stacking of variously-structured layers into sheets with an offset interlayer registry. In all cases, close interlayer contacts between  $\Delta$  and  $\Lambda$  building blocks are possible.

#### References

1. J. D. Hall, T. M. McLean, S. J. Smalley, M. R. Waterland and S. G. Telfer, *Dalton Trans.*, 2010, **39**, 437-445.
2. S. G. Telfer and J. D. Wuest, *Chem. Commun.*, 2007, 3166-3168.
3. B. J. Frisken, *Appl. Opt.*, 2001, **40**, 4087-4091.
4. S. Provencher, *Comp. Phys. Comm.*, 1982, **27**, 229-242; S. Provencher, *Comp. Phys. Comm.*, 1982, **27**, 213-227.
